# Supplementary material
Source: PubMed Central journal article supplement (PMC6484458)

Supplemental Table I. Primers used in CD16B NA1/2 genotyping and CD16A/B specific RT-PCR (in red the nucleotides that differ between CD16A and CD16B primers)

|                  |          | Primer sequences (from 5' to 3') |                              |
|------------------|----------|----------------------------------|------------------------------|
| Genomic PCR      |          | CD16B NA1                        | CD16B NA2                    |
| Forward specific |          | CAGTGGTTTCACAATGTGAA             | CAATGGTACAGCGTGCTT           |
| Reverse common   |          | ATGGACTTCTAGCTGCAC               |                              |
| RT-PCR           |          | CD16A                            | CD16B                        |
| Ex 5             | For ex5  | GCAGTGTCAACCATCTCATCATTCTTT      | GCAGTGTCAACCATCTCATCATTCTCT  |
|                  | Rev ex5  | GTCTTGAGGGTCCTTTCTCCATTTAAAT     | GTCTTGAGGGTCCTTTCTCCATTTAAGT |
| Ex3-4            | For ex 3 | CCTCAATGGTACAGGGTGCTC            | CCTCAATGGTACAGCGTGCTT        |
|                  | Rev ex4  | TATGATGAAAATACTTCCTGCCTT         | TATGATGAAAATACTTCCTGTCTT     |

Supplemental Fig.1 : Anti-CD16 antibody induces, on PMN from both CD16A WT and Null donor, expression of total CD11b as well as the activated CD11b neoantigen, as detected by D12 and CBRM1/5 antibody clones, respectively. The experiments were performed in whole blood drawn in desirudin and stimulated with anti-CD16 Ig for 4 hours.

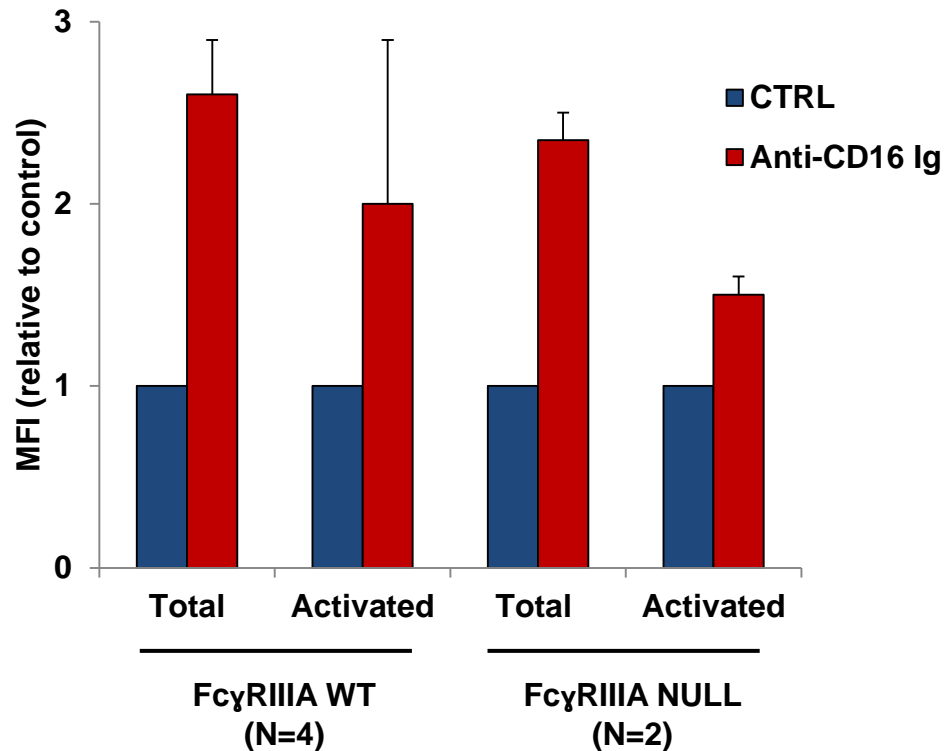

Supplement: blood864538-suppl1.pdf [file blood864538-suppl1.pdf]
